# Supplementary material for: Formate-mediated magnetic superexchange in the model hybrid perovskite [(CH3)2NH2]Cu(HCOO)3
Source: Royal Society of Chemistry journal article supplement (doi:10.1039/d0tc03913f), 2020-01-01
Supplement: d0tc03913f1.pdf [file d0tc03913f1.pdf]

# Formate-mediated Magnetic Superexchange in the Model Hybrid Perovskite $[(\text{CH}_3)_2\text{NH}_2]\text{Cu}(\text{HCOO})_3$

Rebecca Scatena,<sup>\*a</sup> Roger D. Johnson,<sup>b</sup> Pascal Manuel<sup>c</sup> and Piero Macchi<sup>d,e</sup>

<sup>a</sup> Department of Physics, Clarendon Laboratory, University of Oxford, Parks Road, Oxford, OX1 3PU, United Kingdom

<sup>b</sup> Department of Physics and Astronomy, University College London, Gower Street, London, WC1E 6BT, United Kingdom

<sup>c</sup> ISIS Pulsed Neutron and Muon Facility, STFC Rutherford Appleton Laboratory, Chilton, Oxfordshire OX11 0QX, United Kingdom

<sup>d</sup> Department of Chemistry, Materials, and Chemical Engineering, Polytechnic of Milan, Milan 20131, Italy

<sup>e</sup> Istituto Italiano di Tecnologia, Center for Nano Science and Technology CNST@polimi, Milan 20133, Italy

## Supporting Information

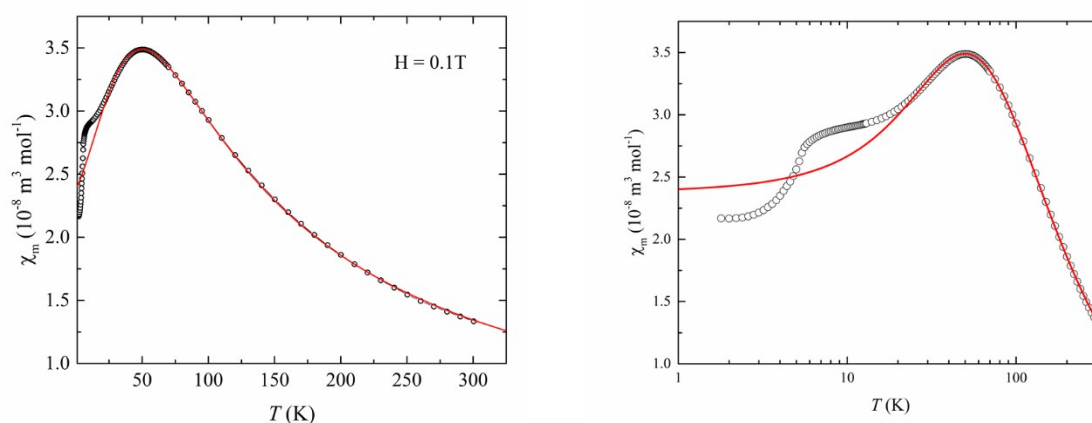

**Figure S1.** Left: Temperature dependent magnetic susceptibility for a polycrystalline sample of  $[\text{Cu}(\text{HCOO})_3]\text{H}_2\text{N}(\text{CH}_3)_2$ . Right: Zoom-in about the magnetic phase transition. Red profile shows a 1D spin  $\frac{1}{2}$  Heisenberg antiferromagnetic correlation.

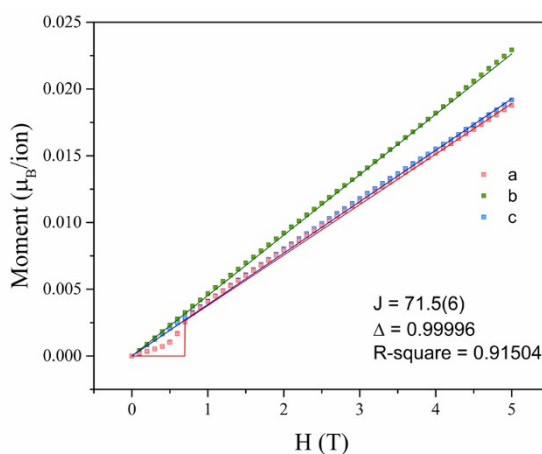

**Figure S2.** Magnetisation as a function of magnetic field applied along the principal crystallographic axis for a single crystal of  $[(\text{CH}_3)_2\text{NH}_2]\text{Cu}(\text{HCOO})_3$  at 2.0 K and minimal model fitting of the linear dependence, see details in the main manuscript.

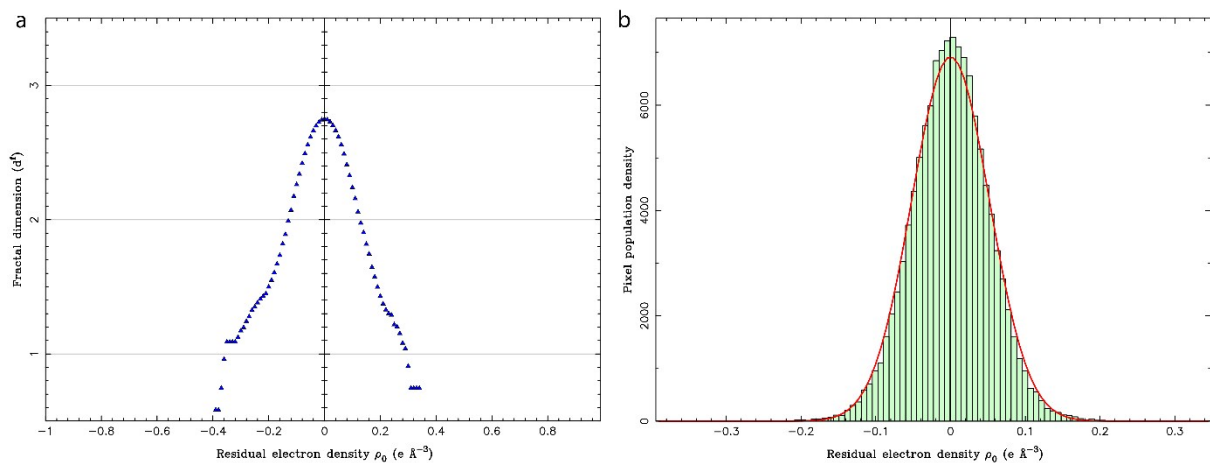

**Figure S3.** Statistics of residual density distribution for charge density modelling: a) fractal dimension plot and b) probability distribution histogram of residuals for the charge density model.

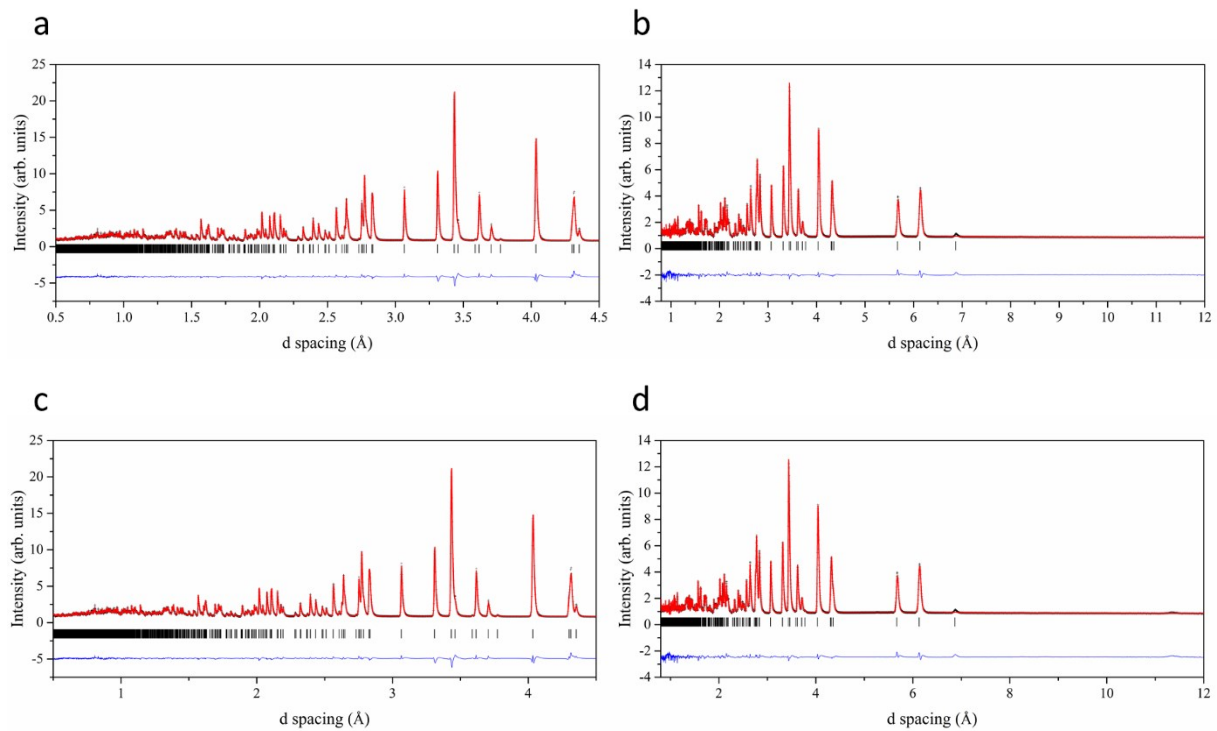

**Figure S4.** Neutron powder diffraction pattern at  $T = 10 \text{ K}$  (a-b) and  $T = 1.5 \text{ K}$  for  $[\text{Cu}(\text{DCOO})_3]\text{D}_2\text{N}(\text{CD}_3)_2$ . Data and fit are shown as black crosses and a red line, respectively, and their difference is drawn as a blue line. The tick marks show possible Bragg reflection positions for the monoclinic  $I2/a$   $[\text{Cu}(\text{DCOO})_3]\text{D}_2\text{N}(\text{CD}_3)_2$  phase (first row).

**Table S1.** Refined Structural Parameter for  $[(\text{CH}_3)_2\text{NH}_2]\text{Cu}(\text{HCOO})_3$  from single crystal x-ray diffraction at 110 K and Time-of-Flight Neutron Powder Diffraction Data (used  $d$ -space range: 0.4 – 12 Å) at 10 K and 1.5 K.

| $T$ (K)                          | 110                                        | 10                                          | 1.5                                         |
|----------------------------------|--------------------------------------------|---------------------------------------------|---------------------------------------------|
| Crystal system                   | monoclinic                                 | monoclinic                                  | monoclinic                                  |
| Space group                      | $I2/a$                                     | $I2/a$                                      | $I2/a$                                      |
| $a$ (Å)                          | 8.7835(1)                                  | 8.74679(8)                                  | 8.74675(8)                                  |
| $b$ (Å)                          | 8.6468(1)                                  | 8.63208(9)                                  | 8.63205(9)                                  |
| $c$ (Å)                          | 11.3974(1)                                 | 11.38748(14)                                | 11.38743(14)                                |
| $\beta$ (°)                      | 95.501(1)                                  | 95.24689(75)                                | 95.24707(75)                                |
| $V$ (Å <sup>3</sup> )            | 861.636(2)                                 | 856.186(16)                                 | 856.175(16)                                 |
| Cu(4d) $B$ (Å <sup>2</sup> )     |                                            | 0.167(87)                                   | 0.156(87)                                   |
| O1(8f) $x, y, z$                 | 0.25787(2), 0.35615(2),<br>0.597452(16)    | 0.25735(35), 0.35900(38),<br>0.09739(25)    | 0.25734(35), 0.35900(39),<br>0.09740(25)    |
| C1(4e) $B$ (Å <sup>2</sup> )     |                                            | 0.451(86)                                   | 0.456(86)                                   |
| C1(4e) $y$                       | 0.28769(2)                                 | 0.29079(62)                                 | 0.29079(62)                                 |
| D1(4e) $B$ (Å <sup>2</sup> )     |                                            | 0.569(127)                                  | 0.565(128)                                  |
| D1(4e) $y$                       | 0.165(3)                                   | 0.15879(72)                                 | 0.15883(72)                                 |
| D1(4e) $B$ (Å <sup>2</sup> )     |                                            | 1.791(130)                                  | 1.768(130)                                  |
| O2(8f) $x, y, z$                 | 0.05043(2), 0.16370(2),<br>0.689269(17)    | 0.44963(33), 0.33316(36),<br>0.30886(28)    | 0.44964(33), 0.33315(36),<br>0.30885(28)    |
| O2(8f) $B$ (Å <sup>2</sup> )     |                                            | 0.360(84)                                   | 0.358(84)                                   |
| O3 (8f) $x, y, z$                | -0.12903(3), -0.01749(3),<br>0.67738(2)    | 0.63258(35), 0.52102(34),<br>0.32453(30)    | 0.63252(35), 0.52101(34),<br>0.32454(30)    |
| O3 (8f) $B$ (Å <sup>2</sup> )    |                                            | 0.455(85)                                   | 0.453(85)                                   |
| C2(8f) $x, y, z$                 | -0.00449(2), 0.037034(18),<br>0.720932(14) | 0.50555(35), 0.45976(38),<br>0.28357(29)    | 0.50554(35), 0.45976(38),<br>0.28354(29)    |
| C2(8f) $B$ (Å <sup>2</sup> )     |                                            | 0.752(89)                                   | 0.754(89)                                   |
| D2(8f) $x, y, z$                 | 0.0617(15), -0.0281(13),<br>0.7897(12)     | 0.43756(32), 0.53063(41),<br>0.21313(28)    | 0.43758(32), 0.53063(41),<br>0.21312(28)    |
| D2(8f) $B$ (Å <sup>2</sup> )     |                                            | 1.644(96)                                   | 1.643(96)                                   |
| N1(4e) $y$                       | 0.18549(2)                                 | -0.18637(44)                                | -0.18637(44)                                |
| N1(4e) $B$ (Å <sup>2</sup> )     |                                            | 0.725(90)                                   | 0.723(90)                                   |
| C3(8f) $x, y, z$                 | -0.13693(3), 0.28106(3),<br>0.44426(2)     | 0.13343(42), -0.28592(44),<br>0.05255(35)   | 0.13341(42), -0.28590(44),<br>0.05253(35)   |
| C3(8f) $B$ (Å <sup>2</sup> )     |                                            | 1.035(83)                                   | 1.027(83)                                   |
| D3(8f) $x, y, z$                 | -0.1979(17), 0.3528(19),<br>0.3800(15)     | 0.05516(32), -0.20670(41),<br>0.09188(24)   | 0.05517(32), -0.20669(41),<br>0.09188(24)   |
| D3(8f) $B$ (Å <sup>2</sup> )     |                                            | 1.675(94)                                   | 1.663(94)                                   |
| D4(8f) $x, y, z$                 | -0.0793(18), 0.3517(19),<br>0.5112(14)     | 0.19562(34), -0.35272(47),<br>0.12190(29)   | 0.19564(34), -0.35274(47),<br>0.12188(29)   |
| D4(8f) $B$ (Å <sup>2</sup> )     |                                            | 1.545(97)                                   | 1.549(97)                                   |
| D5(8f) $x, y, z$                 | -0.0534(19), 0.2032(17),<br>0.4060(14)     | 0.07378(35), -0.36171(39), -<br>0.01241(28) | 0.07379(35), -0.36169(39), -<br>0.01241(28) |
| D5(8f) $B$ (Å <sup>2</sup> )     |                                            | 2.217(96)                                   | 2.219(96)                                   |
| D6/H6 (8f) $x, y, z$             | -0.1939(19), 0.1157(18),<br>0.5653(16)     | 0.19541(51), -0.11411(54), -<br>0.06414(43) | 0.19547(51), -0.11413(54), -<br>0.06413(43) |
| D6/H6 (8f) $B$ (Å <sup>2</sup> ) |                                            | 2.589(150)                                  | 2.577(150)                                  |
| D6/H6 (8f) $g$                   |                                            | 0.818(5)/0.182(5)                           | 0.818(0)/0.182(0)                           |
|                                  | $r_{\text{int}}$ 3.09 %                    | $R_{\text{wp}}$ 2.92 %                      | $R_{\text{wp}}$ 2.94 %                      |
|                                  | GOF $w$ 1.15                               | $R_p$ 3.02 %                                | $R_p$ 3.07 %                                |
|                                  | $R_1$ (F) [ $I \geq 2\sigma$ ] 1.35 %      | $R_F$ 3.44 %                                | $R_F$ 3.43 %                                |

**Table S2.** Bond lengths in  $[\text{Cu}(\text{HCOO})_3]\text{H}_2\text{N}(\text{CH}_3)_2$  refined at  $T = 110, 10$  and  $1.5$  K from single crystal X-ray and Neutron powder diffraction data. The atomic labels refer to the those reported in the corresponding structural cif files.

| $T$ (K)     | 110         | 10       | 1.5      |
|-------------|-------------|----------|----------|
| Source      | X-ray       | Neutron  | Neutron  |
| Cu-O1 (Å)   | 1.97312(19) | 1.982(4) | 1.982(4) |
| Cu-O2 (Å)   | 1.96877(18) | 1.949(3) | 1.949(3) |
| Cu-O3 (Å)   | 2.4545(3)   | 2.417(3) | 2.417(3) |
| C1-O1(Å)    | 1.2546(2)   | 1.252(5) | 1.252(5) |
| C1-H1/D1(Å) | 1.06(3)     | 1.139(8) | 1.139(8) |
| C2-O2(Å)    | 1.2633(3)   | 1.242(5) | 1.242(5) |
| C2-O3(Å)    | 1.2495(4)   | 1.280(5) | 1.279(5) |
| C2-H2/D2(Å) | 1.087(13)   | 1.133(5) | 1.132(5) |
| C3-N1(Å)    | 1.4811(3)   | 1.499(5) | 1.499(5) |
| C3-H3/D3(Å) | 1.064(16)   | 1.092(5) | 1.092(5) |
| C3-H4/D4(Å) | 1.066(16)   | 1.084(6) | 1.084(6) |
| C3-H5/D5(Å) | 1.115(17)   | 1.084(6) | 1.084(6) |
| N3-H6/D6(Å) | 1.044(17)   | 1.042(5) | 1.042(5) |

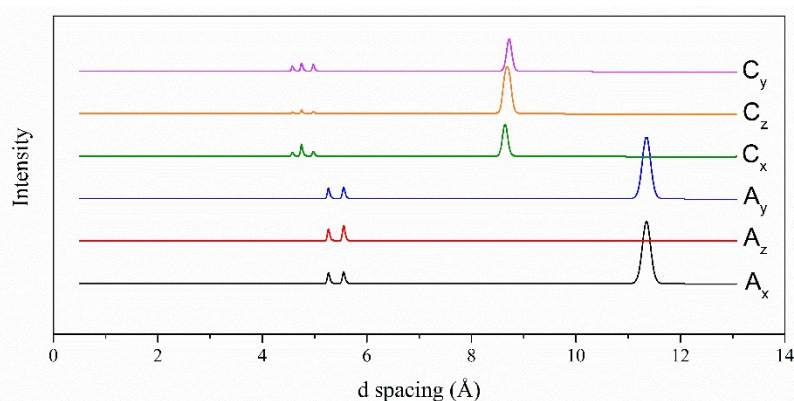

**Figure S5.** Simulation of the neutron diffraction pattern for all possible magnetic structures allowed by the symmetry of the system given propagation vector  $(0,0,1)$ .

**Table S3.** QTAIM integrated charges from experimental multipolar model (Exp. MM) and multipolar model refined against a calculated structure factor (Calc. MM) for  $[\text{Cu}(\text{HCOO})_3]\text{H}_2\text{N}(\text{CH}_3)_2$ .

|                  | Exp. MM |        | Calc. MM |        |
|------------------|---------|--------|----------|--------|
|                  | atomic  | ionic  |          |        |
| $\text{Cu}^{2+}$ | +0.969  | +0.969 | +0.816   | +0.816 |
| $\text{O}^{2-}$  | -1.176  |        | -1.036   |        |
| C1               | +1.825  | -0.340 | +1.456   | -0.571 |
| H1               | +0.187  |        | +0.044   |        |
| $\text{O}^{2-}$  | -1.326  |        | -1.048   |        |
| $\text{O}^{3-}$  | -1.184  |        | -1.018   |        |
| C2               | +1.541  | -0.811 | +1.433   | -0.585 |
| H2               | +0.158  |        | +0.049   |        |
| C3               | +0.165  |        | +0.328   |        |
| H3               | +0.119  |        | +0.049   |        |
| H4               | +0.105  |        | +0.057   |        |
| H5               | +0.177  | +1.032 | +0.032   | +0.956 |
| N1               | +0.489  |        | +0.470   |        |
| H6               | -1.076  |        | -0.917   |        |
